# Supplementary material
Source: PubMed Central journal article supplement (PMC7437085)
Supplement: sj-pdf-1-ueg-10.1177_2050640620934911.pdf [file sj-pdf-1-ueg-10.1177_2050640620934911.pdf]

# Supplement

## List of Abbreviations

|         |                                                 |
|---------|-------------------------------------------------|
| AIH     | Autoimmune Hepatitis                            |
| AIP     | Autoimmune Pancreatitis                         |
| AMA     | Anti-mitochondrial antibodies                   |
| ASC     | Autoimmune sclerosing cholangitis               |
| AUC     | Area under the curve                            |
| CA 19-9 | Carbohydrate antigen 19-9                       |
| CCL-18  | Chemokine (C-C motif) ligand 18                 |
| CBD     | Common Bile Duct                                |
| CNI     | Calcineurin inhibitor                           |
| CP      | Chronic Pancreatitis                            |
| CPG     | Clinical Practice Guideline                     |
| CT      | Computer Tomography                             |
| DM      | Diabetes Mellitus                               |
| EPC     | European Pancreatic Club                        |
| ERCP    | Endoscopic Retrograde Cholangio-Pancreatography |
| EUS     | Endoscopic Ultra-sonography                     |
| FDG     | Fluoro-D-Glucose                                |

|            |                                                                              |
|------------|------------------------------------------------------------------------------|
| FNB        | Fine needle Biopsy                                                           |
| GC         | Glucocorticoids                                                              |
| GEL        | Granulocyte-epithelial lesion                                                |
| GRADE      | Grading of Recommendations Assessment, Development, and Evaluation           |
| HaPanEU    | Hormonising Pancreatitis across Europe (UEG guidelines chronic pancreatitis) |
| HISORt     | Histology, imaging, serology, other organ involvement, response to therapy   |
| HPF        | High Power Field                                                             |
| IAC        | Immune associated cholangitis                                                |
| IBD        | Inflammatory Bowel Disease                                                   |
| IgG4-RD    | Immunoglobulin 4 related disease                                             |
| IgG4-RD RI | Immunoglobulin 4 related disease Response Index                              |
| IPMN       | Intraductal Papillary Mucinous Neoplasia                                     |
| IRC        | Immune-Related Cholangitis                                                   |
| MMF        | Mycophenolate Mofetil                                                        |
| MPD        | Main Pancreatic Duct                                                         |
| MRCP       | Magnetic Resonance Cholangio-Pancreatography                                 |
| MRI        | Magnetic Resonance Imaging                                                   |
| MTX        | Methotrexate                                                                 |
| OOI        | Other Organ Involvement                                                      |
| PBC        | Primary Biliary Cirrhosis                                                    |

|        |                                        |
|--------|----------------------------------------|
| PDAC   | Pancreatic Ductal Adeno-Carcinoma      |
| PEI    | Pancreatic Exocrine Insufficiency      |
| PET-CT | Positron-Emission Tomography – CT      |
| PSC    | Primary Sclerosing Cholangitis         |
| qPCR   | quantitative Polymerase Chain Reaction |
| RNA    | Ribonucleic acid                       |
| SGF    | Swedish Gastroenterology Society       |
| SI     | Signal Intensity                       |
| TED    | Test and evaluation Directorate        |
| UDCA   | Ursodeoxycholic acid                   |
| UEG    | United European Gastroenterology       |
| US     | Ultrasound                             |
| WP     | Working Party                          |

**Table S1:** GRADE system

A= high quality evidence

B= moderate quality evidence

C= poor quality evidence

1= strong recommendation

2= weak recommendation

|                                                                    | <b>Clarity of risk/benefit</b>                                            | <b>Quality of supporting evidence</b>                                                                                                                                                                                                                                                                    | <b>Implications</b>                                                                                  |
|--------------------------------------------------------------------|---------------------------------------------------------------------------|----------------------------------------------------------------------------------------------------------------------------------------------------------------------------------------------------------------------------------------------------------------------------------------------------------|------------------------------------------------------------------------------------------------------|
| <b>1A.</b><br>Strong recommendation.<br>High quality evidence.     | Benefits clearly outweigh risk and burdens, or vice versa.                | Consistent evidence from well-performed RCTs or overwhelming evidence in some other form. Further research is unlikely to change our confidence in estimating benefit and risk.                                                                                                                          | Strong recommendation, can apply to most patients in most circumstances without reservation.         |
| <b>1B.</b><br>Strong recommendation.<br>Moderate quality evidence. | Benefits clearly outweigh risk and burdens, or vice versa.                | Evidence from RCTs with important limitations (inconsistent results, methodological flaws, indirect or imprecise), or very strong evidence in some other form. Further research (if performed) is likely to have an impact on our confidence in estimating benefit and risk and may change the estimate. | Strong recommendation, likely to apply to most patients.                                             |
| <b>1C.</b><br>Strong recommendation.<br>Low quality evidence.      | Benefits appear to outweigh risk and burdens, or vice versa.              | Evidence from observational studies, unsystematic clinical experience, or from RCTs with serious flaws. Any estimate of effect is uncertain.                                                                                                                                                             | Relatively strong recommendation; might change when higher quality evidence becomes available.       |
| <b>2A.</b><br>Weak recommendation.<br>High quality evidence.       | Benefits closely balanced with risks and burdens                          | Consistent evidence from well performed RCTs or overwhelming evidence in some other form. Further research is unlikely to change our confidence in the estimate of benefit and risk.                                                                                                                     | Weak recommendation, best action may differ depending on circumstances or patients or social values. |
| <b>2B.</b><br>Weak recommendation.<br>Moderate quality evidence.   | Benefits closely balanced with risks and burdens, some uncertainly in the | Evidence from randomized, controlled trials with important limitations                                                                                                                                                                                                                                   | Weak recommendation, alternative approaches likely to be better for some                             |

|                                                             |                                                                                                                        |                                                                                                                                                                                                                                                            |                                                                         |
|-------------------------------------------------------------|------------------------------------------------------------------------------------------------------------------------|------------------------------------------------------------------------------------------------------------------------------------------------------------------------------------------------------------------------------------------------------------|-------------------------------------------------------------------------|
|                                                             | estimates of benefits, risks and burdens                                                                               | (inconsistent results, methodological flaws, indirect or imprecise), or very strong evidence in some other form. Further research (if performed) is likely to have an impact on our confidence in estimating benefit and risk and may change the estimate. | patients under some circumstances.                                      |
| <b>2C.</b><br>Weak recommendation.<br>Low quality evidence. | Uncertainty in the estimates of benefits, risks, and burdens; benefits may be closely balanced with risks and burdens. | Evidence from observational studies, unsystematic clinical experience, or from RCTs with serious flaws. Any estimate of effect is uncertain.                                                                                                               | Very weak recommendation; other alternatives may be equally reasonable. |

## **Table S2      Structure of the Working parties (WP)**

### **1. Biomarkers in IgG4-related gastrointestinal diseases**

Jonas Rosendahl (leader), Enrique de Madaria, Luca Frulloni, Markus M.Lerch,  
J.-Matthias Löhr

### **2. IgG4-related disease of pancreas**

Miroslav Vujasinovic (leader), Marc Basselink, Jens Brøndum Frøkjær, Marco Del Chiaro,  
Julio Iglesias-Garcia, Thilo Hackert, Nikolaos Kartalis, Alexander Kleger, Johanna  
Laukkarinen, Alexander Schneider, Caroline S. Verbeke, Marie Pierre Nicolas-Vullierme.

### **3. IgG4-related diseases of liver and bile-ducts**

Ulrich Beuers (leader), Domenico Alvaro, Frank Lammert, Joanne Verheij.

### **4. IgG4-related gastrointestinal diseases of esophagus, stomach and bowel**

Deniz Duman (leader), Sönke Detlefsen, Alexey Okhlobystin, Natalia Gubertskis, Gabriele  
Capurso.

### **5. Clinical manifestations and management of systemic IgG4-related diseases**

Nicolas Schleinitz (leader), Eric F.H.van Bommel , Emanuel Della-Torre, Andrea Laghi, Nick  
de Vries

### **6. IgG4-related digestive diseases in children**

Grzegorz Oracz (leader), Piotr Czubkowski, Frederik Lindgren, Andrea Parniczky, Heiko Witt

### **7. IgG4-related gastrointestinal diseases and diabetes mellitus**

Nils Ewald (leader), Gabriele Capurso, Enrique Dominguez-Munoz

### **8. IgG4-related gastrointestinal diseases and cancer**

Emma L Culver (leader), Alexander Schneider, Sönke Detlefsen, Raffaella Pozzi Mucelli

### **9. Systemic treatment of IgG4-related digestive diseases**

Vinciane Rebours (leader), Frank Buttgerit, Enrique de Madaria, Emanuel Della-Torre, Eric  
F.H.van Bommel, Nicolas Schleinitz

**Table S3: IgG4-RD Responder Index**

**Scoring Rules**

Scoring refers to manifestations of disease activity present in the last 28 days

- Scoring: 0    Normal or resolved
- 1    Improved but still present
- 2    New / Recurrence while patient is off treatment or unchanged from the previous visit\*
- 3    Worsened or new disease manifestation despite treatment

\*Unchanged from previous visit will often refer to disease manifestations that require follow-up imaging to assess accurately

**Definitions**

**Organ/Site score:** The overall level of IgG4-RD activity within a specific organ system

**Symptomatic:** Is the disease manifestation in a particular organ system symptomatic? (Y = yes; N = no)

**Urgent disease:** Disease that requires treatment immediately to prevent serious organ dysfunction (Y = yes; N = no)

(Presence of **urgent disease** within an organ leads to **DOUBLING** of that organ system score)

**Damage:** Organ dysfunction that has occurred as a result of IgG4-RD and is considered permanent (Y = yes; N = no)

| Organ/Site                                  | Activity               |                      |                 | Damage |                      |
|---------------------------------------------|------------------------|----------------------|-----------------|--------|----------------------|
|                                             | Organ/Site Score (0-3) | Symptomatic (Yes/No) | Urgent (Yes/No) | Yes/No | Symptomatic (Yes/No) |
| Meninges                                    |                        |                      |                 |        |                      |
| Pituitary Gland                             |                        |                      |                 |        |                      |
| Orbital lesion (specify location):<br>_____ |                        |                      |                 |        |                      |
| Lacrimal Glands                             |                        |                      |                 |        |                      |
| Parotid Glands                              |                        |                      |                 |        |                      |
| Submandibular Glands                        |                        |                      |                 |        |                      |
| Other Salivary Glands (specify):            |                        |                      |                 |        |                      |

|                                                                                                                                                                                                    |                           |                         |                    |               |                         |
|----------------------------------------------------------------------------------------------------------------------------------------------------------------------------------------------------|---------------------------|-------------------------|--------------------|---------------|-------------------------|
| _____                                                                                                                                                                                              |                           |                         |                    |               |                         |
| Mastoiditis / Middle ear disease                                                                                                                                                                   |                           |                         |                    |               |                         |
| Nasal Cavity Lesions                                                                                                                                                                               |                           |                         |                    |               |                         |
| Sinusitis                                                                                                                                                                                          |                           |                         |                    |               |                         |
| Other ENT Lesions, e.g., tonsillitis,<br>pharyngitis (specify):<br><br>_____                                                                                                                       |                           |                         |                    |               |                         |
| Thyroid                                                                                                                                                                                            |                           |                         |                    |               |                         |
| Lungs                                                                                                                                                                                              |                           |                         |                    |               |                         |
| Lymph Nodes (please circle site of<br>involvement, below):                                                                                                                                         |                           |                         |                    |               |                         |
| <p style="text-align: center;">Submental   Submandibular   Cervical   Axillary   Mediastinal   Hilar</p> <p style="text-align: center;">Abdominal/Pelvic   Inguinal   Other lymph node chains:</p> |                           |                         |                    |               |                         |
|                                                                                                                                                                                                    | <b>Activity</b>           |                         |                    | <b>Damage</b> |                         |
| Organ/Site                                                                                                                                                                                         | Organ/Site<br>Score (0-3) | Symptomatic<br>(Yes/No) | Urgent<br>(Yes/No) | Yes/No        | Symptomatic<br>(Yes/No) |
| Aorta / Large Blood Vessels                                                                                                                                                                        |                           |                         |                    |               |                         |
| Heart/Pericardium                                                                                                                                                                                  |                           |                         |                    |               |                         |
| Retroperitoneal Fibrosis                                                                                                                                                                           |                           |                         |                    |               |                         |
| Sclerosing Mediastinitis                                                                                                                                                                           |                           |                         |                    |               |                         |
| Sclerosing Mesenteritis                                                                                                                                                                            |                           |                         |                    |               |                         |
| Pancreas                                                                                                                                                                                           |                           |                         |                    |               |                         |
| Liver                                                                                                                                                                                              |                           |                         |                    |               |                         |
| Bile ducts                                                                                                                                                                                         |                           |                         |                    |               |                         |
| Kidney                                                                                                                                                                                             |                           |                         |                    |               |                         |
| Skin                                                                                                                                                                                               |                           |                         |                    |               |                         |
| Constitutional symptoms not<br>attributable to involvement of a<br>particular organ (weight loss, fever,<br>fatigue caused by active IgG4-RD)                                                      |                           |                         |                    |               |                         |
| Other involvement - specify:                                                                                                                                                                       |                           |                         |                    |               |                         |



|                                                                                                                                     |       |       |       |       |       |
|-------------------------------------------------------------------------------------------------------------------------------------|-------|-------|-------|-------|-------|
| (Consider prostate, breast, gallbladder involvement; and other. Each "Other" item is counted separately.)<br><br>_____<br><br>_____ | _____ | _____ | _____ | _____ | _____ |
|                                                                                                                                     | _____ | _____ | _____ | _____ | _____ |
|                                                                                                                                     | _____ | _____ | _____ | _____ | _____ |

**Total Activity Score**

Organ/sites (x 2 if urgent): \_\_\_\_\_

Total **urgent** organs: \_\_\_\_\_

Total **symptomatic (active)** organs: \_\_\_\_\_

Total **damaged** organs: \_\_\_\_\_

Total **symptomatic (damage)** organs: \_\_\_\_\_
